# Supplementary material for: Development of TASP0410457 (TASP457), a novel dihydroquinolinone derivative as a PET radioligand for central histamine H3 receptors
Source: PubMed Central journal article supplement (PMC4747952; doi:10.1186/s13550-016-0170-2), 2016-02-09

Supplemental Fig. 3

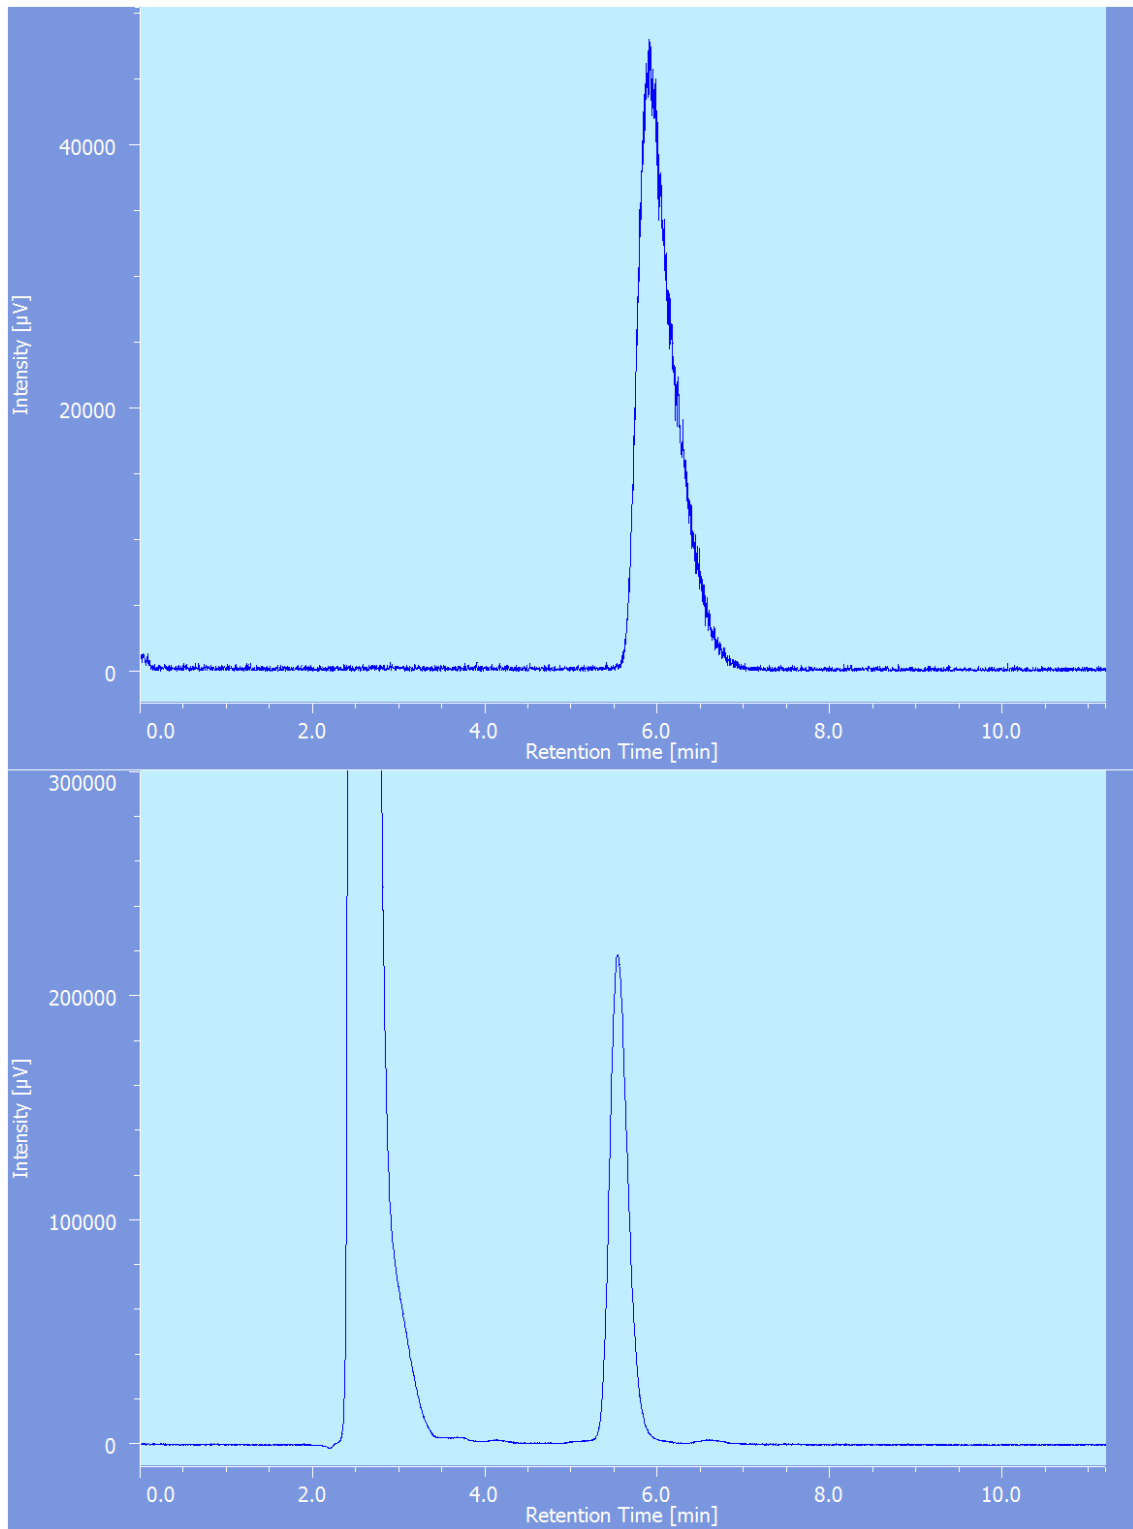

Supplement: 13550_2016_170_MOESM4_ESM.pdf [file 13550_2016_170_MOESM4_ESM.pdf]
