# Supplementary material for: Development of TASP0410457 (TASP457), a novel dihydroquinolinone derivative as a PET radioligand for central histamine H3 receptors
Source: Springer Nature journal article supplement (doi:10.1186/s13550-016-0170-2), 2016-02-09

Supplemental Fig. 2

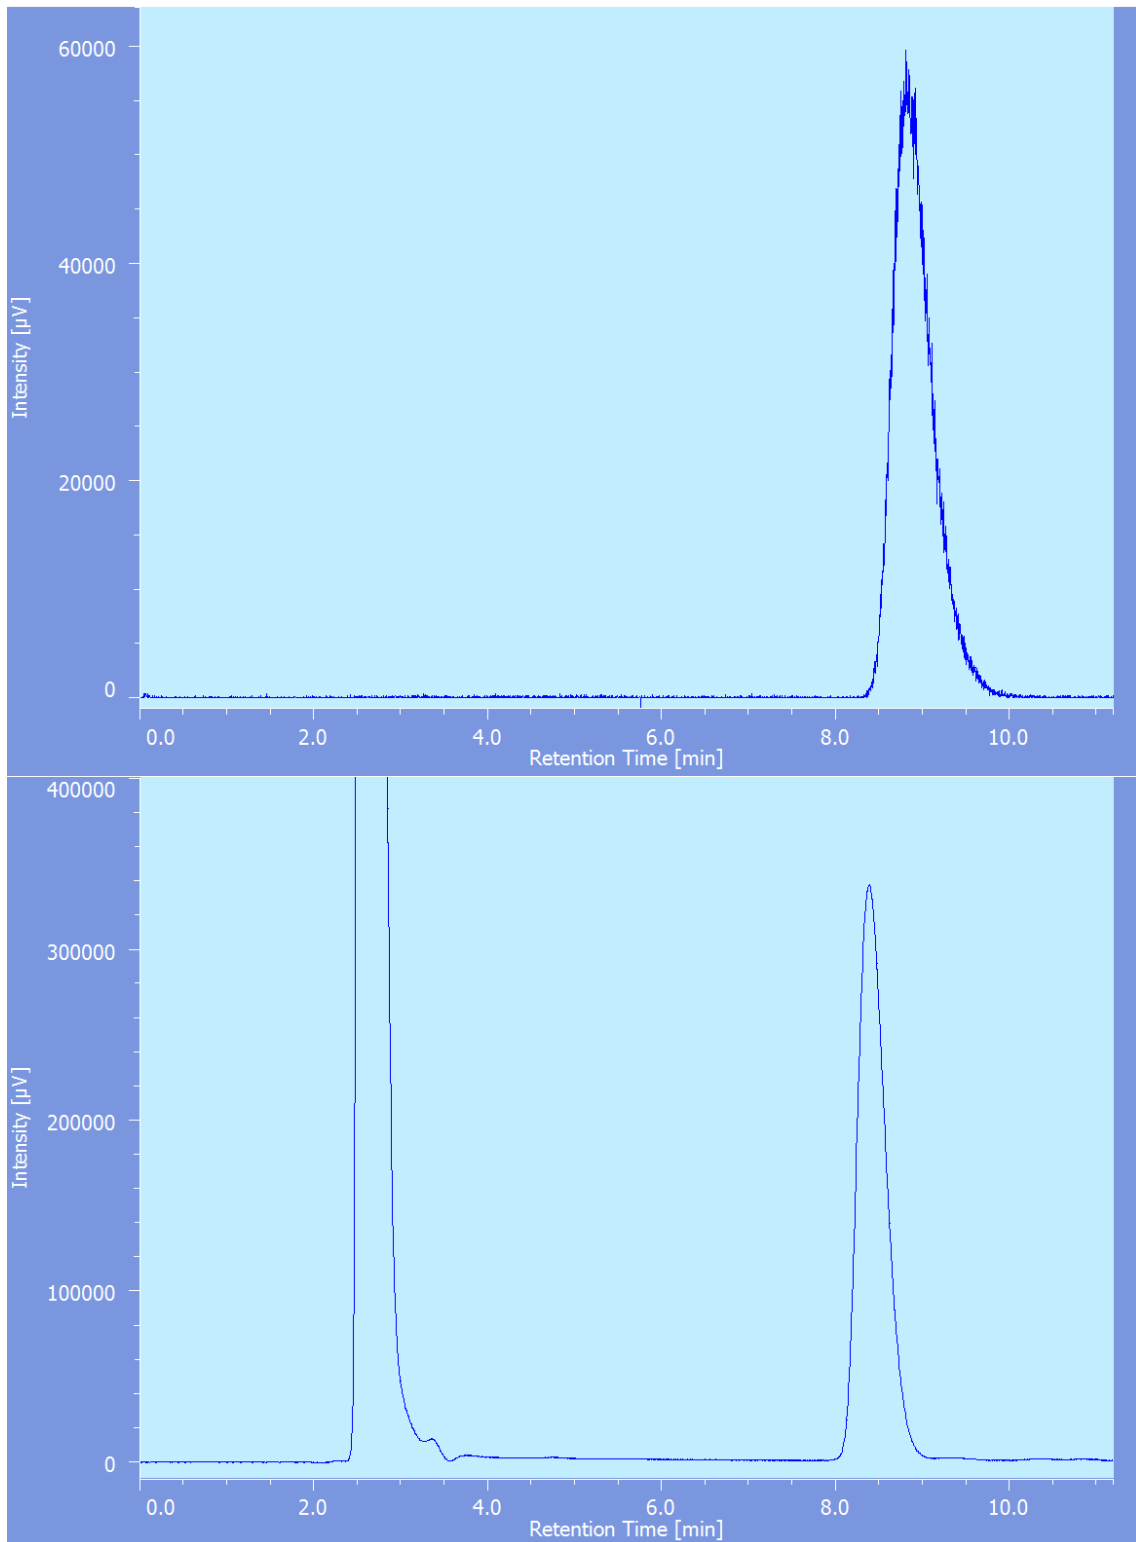

Supplement: MOESM3 [file 9786482]
